# Supplementary material
Source: MDPI journal article supplement (https://www.mdpi.com/2072-4292/13/4/649)
Supplement: s1 [file s1]

# Article

## Supplementary Data: A High-Speed, Light-Weight Scalar Magnetometer Bird for km Scale UAV Magnetic Surveying: On Sensor Choice, Bird Design, and Quality of Output Data

Arne Døssing <sup>1,2,\*</sup> , Eduardo Lima Simoes da Silva <sup>1,2</sup>, Guillaume Martelet <sup>3,\*</sup> , Thorkild Maack Rasmussen <sup>4,\*</sup> , Eric Gloaguen <sup>3,\*</sup> , Jacob Thejll Petersen <sup>1</sup>, Johannes Linde <sup>5</sup>

- <sup>1</sup> CMAGTRES, Geomagnetism, DTU Space, Technical University Denmark, Centrifugevej 356, 2850 Kgs. Lyngby, Denmark; ards@space.dtu.dk (A.D.); edsd@space.dtu.dk (E.L.S.d.S.); jacth@space.dtu.dk (J.T.P.)
  - <sup>2</sup> DTU CERE, Technical University Denmark, 2850 Kgs. Lyngby, Denmark.
  - <sup>3</sup> Bureau de Recherches Géologiques et Minières (BRGM)
  - <sup>4</sup> Department of Civil, Environmental and Natural Resources Engineering Luleå Technical University, Luleå, Sweden
  - <sup>5</sup> Geodesy and Earth Observation, DTU Space, Elektrovej 328, 2850 Kgs. Lyngby, Denmark; jlinde@space.dtu.dk
- \* Correspondence: ards@space.dtu.dk (A.D.); Tel. +45–45 25 97 73

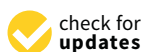

**Citation:** Døssing, A.; Lima Simoes da Silva, E.; Martelet, G.; Maack Rasmussen, T.; Gloaguen, E.; Thejll Petersen, J.; Linde, J. A High-Speed, Light-Weight Scalar Magnetometer Bird for km scale UAV Magnetic Surveying: On Sensor Choice, Bird Design, and Quality of Output Data. *Remote Sens.* **2021**, *1*, 1. <https://doi.org/>

### Academic Editor:

Received: 13 January 2021

Accepted: 08 February 2021

Published:

**Publisher's Note:** MDPI stays neutral with regard to jurisdictional claims in published maps and institutional affiliations.

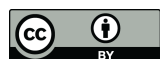

**Copyright:** © 2021 by the authors. Licensee MDPI, Basel, Switzerland. This article is an open access article distributed under the terms and conditions of the Creative Commons Attribution (CC BY) license (<https://creativecommons.org/licenses/by/4.0/>).

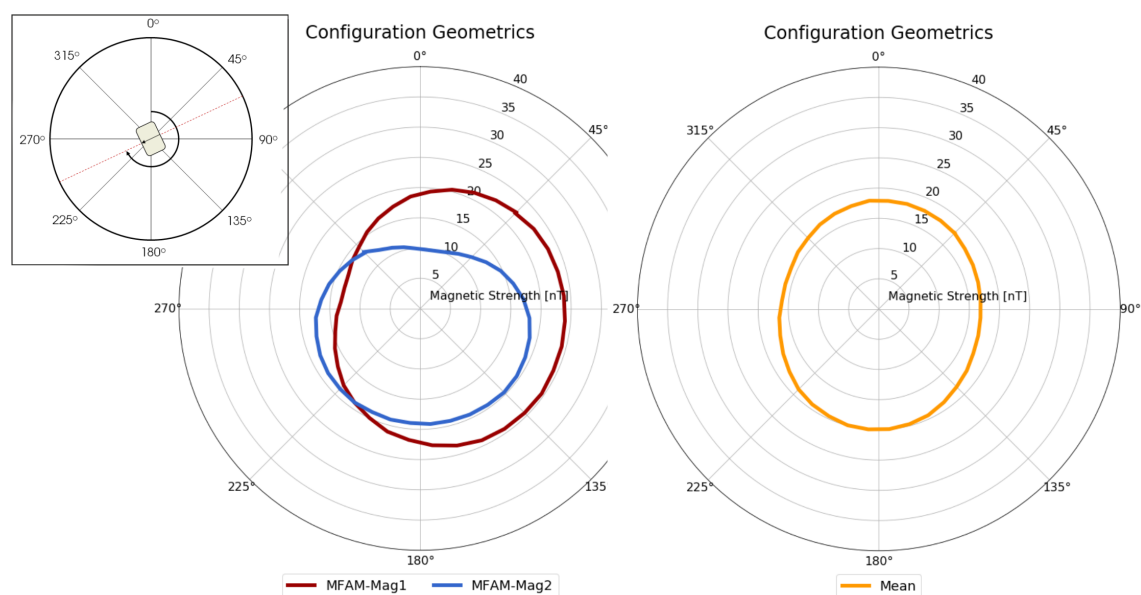

**Figure S1.** Heading error test of the MFAM conducted at the Brorfelde Geomagnetic Observatory in Denmark in 2018.

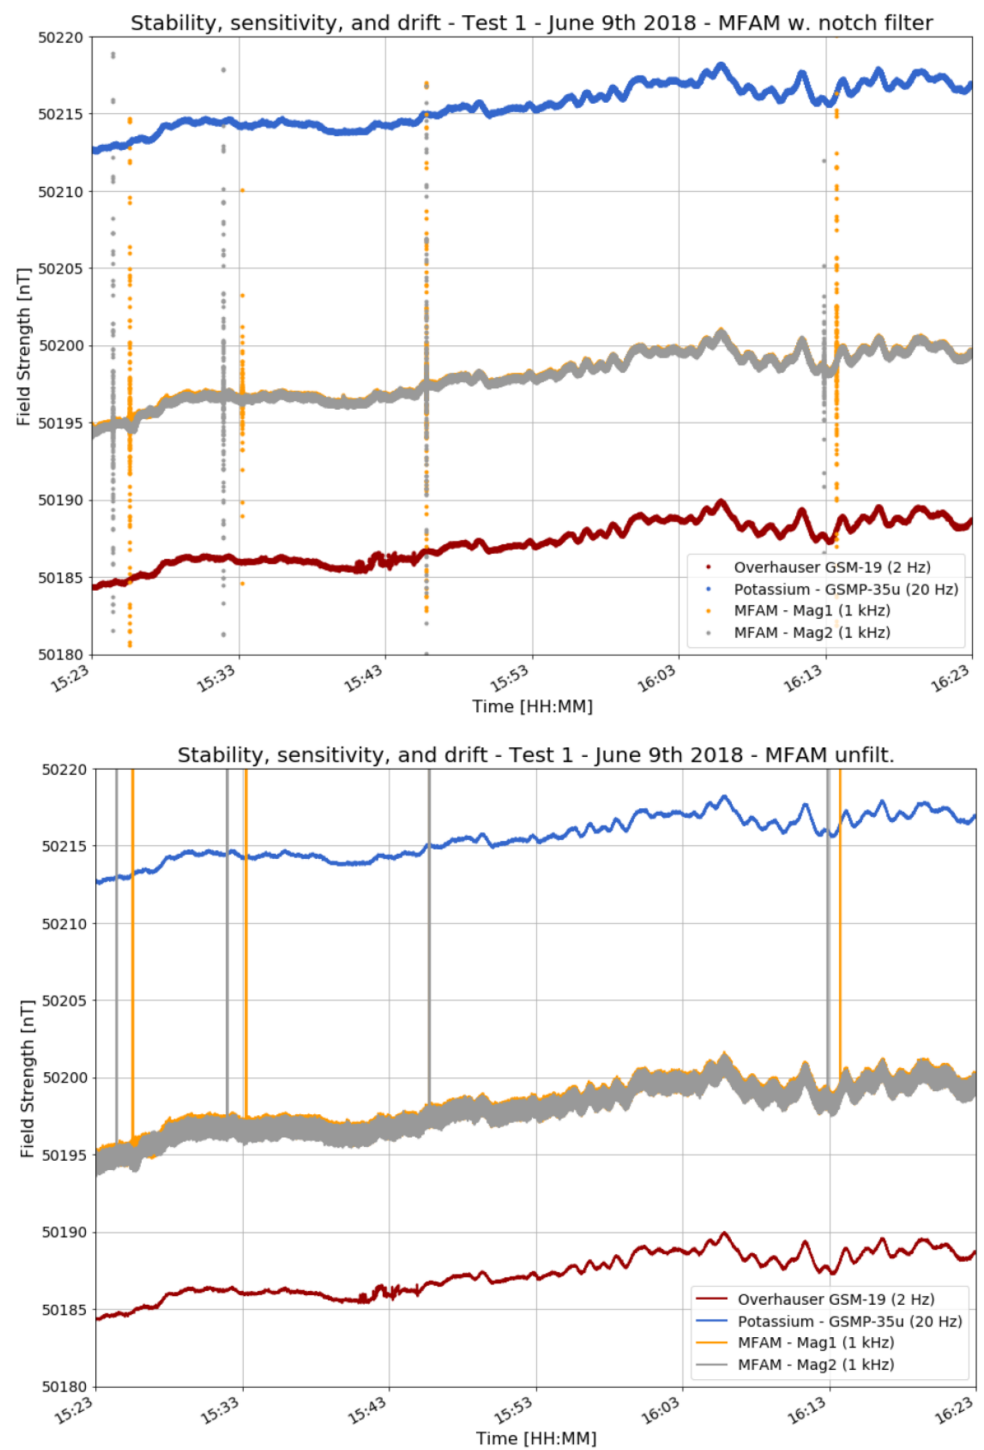

**Figure S2.** Data collected as part of Test 1. Notice the spiky behavior of the MFAM, its significant drift during the first 30 min and the undulations near 15:28.

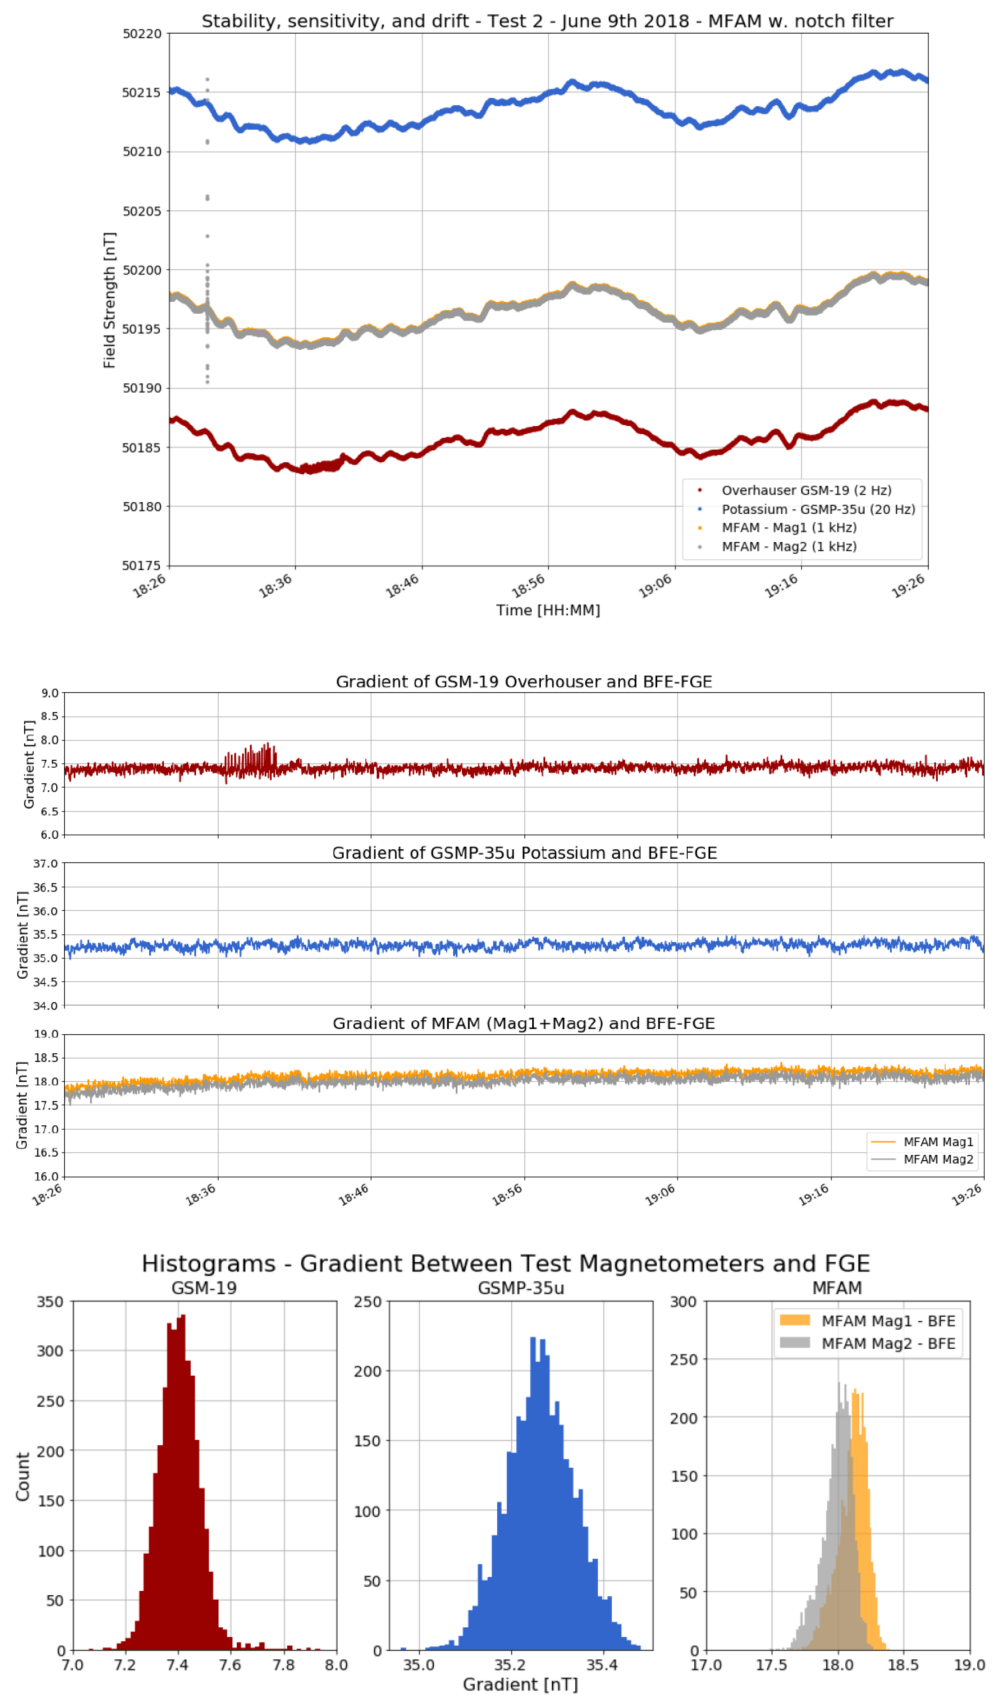

**Figure S3.** Test 2 magnetometer stability test. A similar test setup was applied as in test 1.

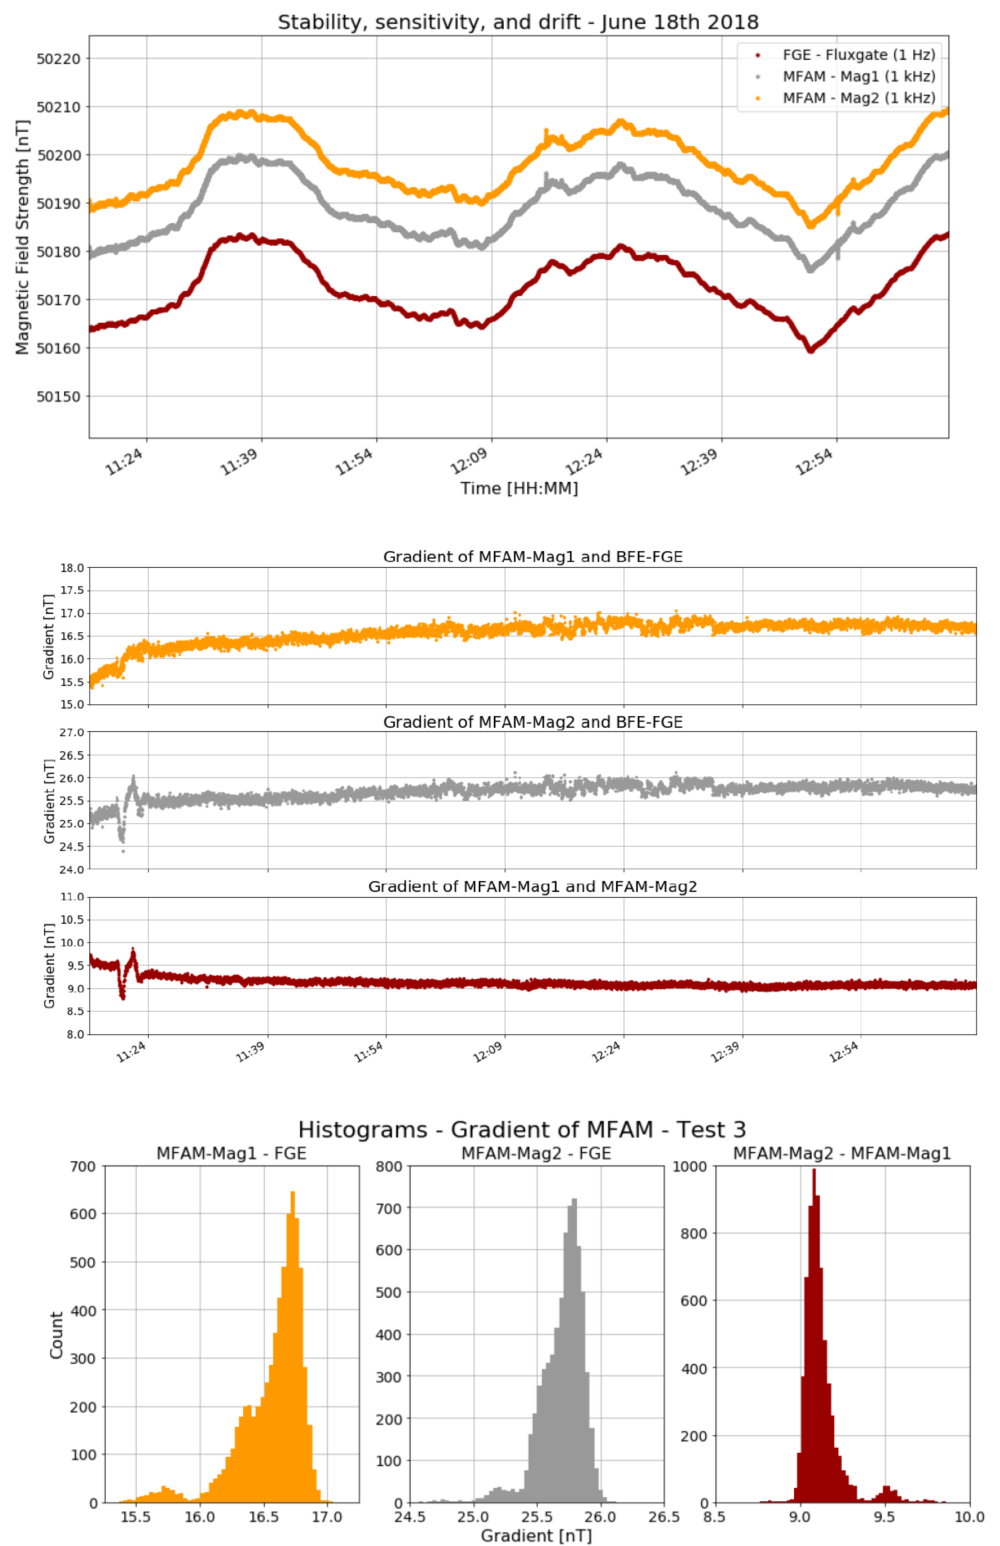

**Figure S4.** Summary of Test 3—an extra stability test of the MFAM.



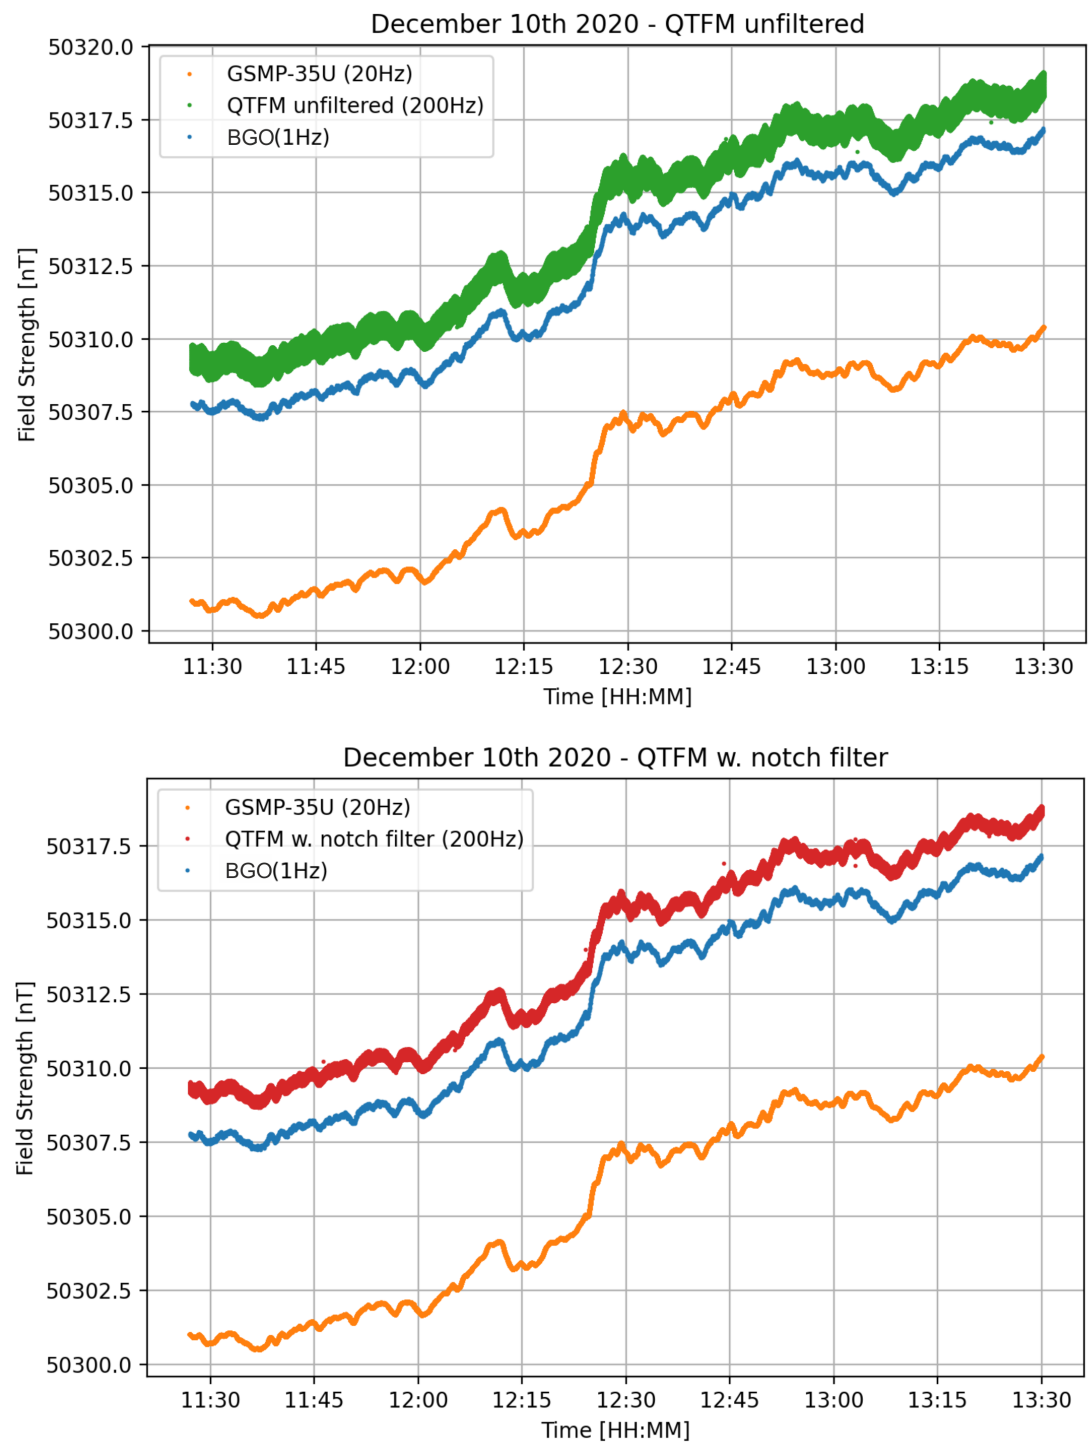

**Figure S5.** Data collected as part of Test 4—focusing on the QTFM sensor.

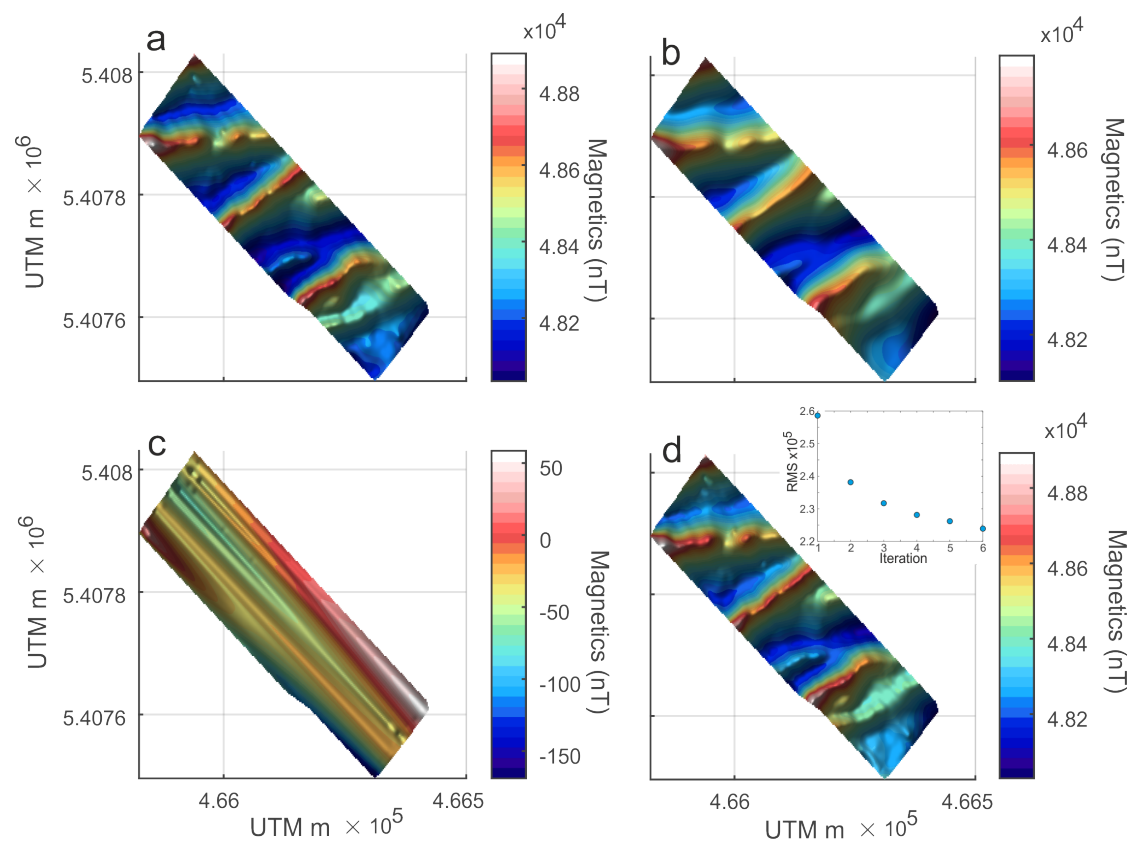

**Figure S6.** Sub-survey S3 line levelling of trimmed data (converted to UTM projection). (a) Unlevelled; (b) Regional field; (c) Residual; (d) Levelled. The data were levelled over over six iterations, each time with a decreasing root-mean-square error to the regional field (see inset figure in (d)).

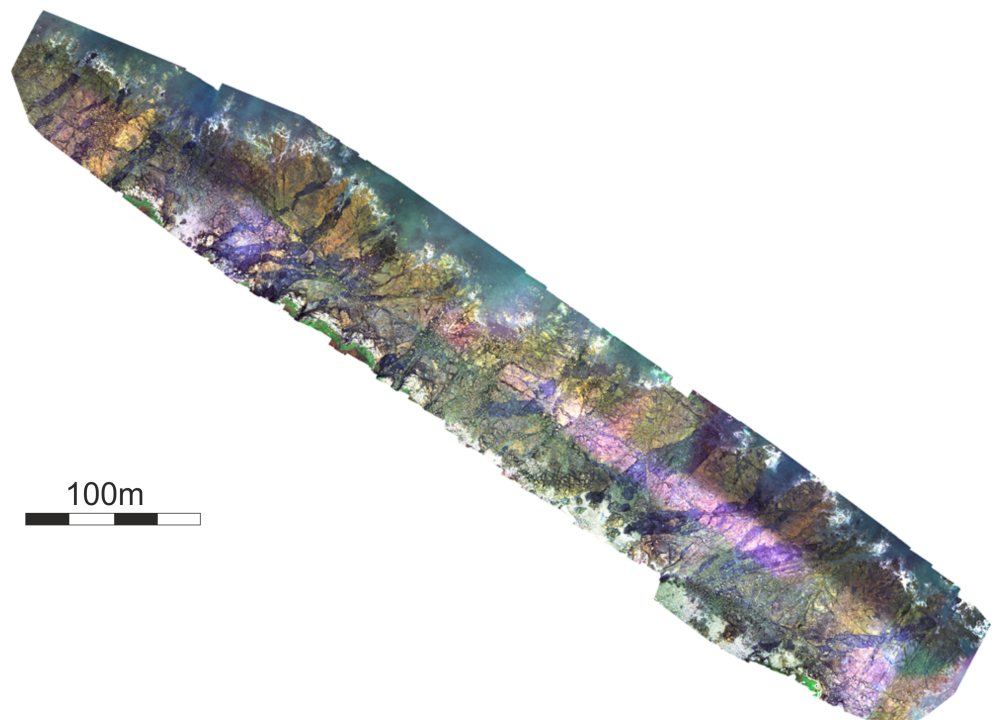

**Figure S7.** Orthophoto from UAV photogrammetry of the southeastern part of the study area, near sub-survey S3.
